# Supplementary material
Source: publisher figshare collection journal article supplement (https://tandf.figshare.com/ndownloader/files/12565412)
Supplement: Supplementary file 1 [file 12565412]

**Table S1 Primers used in the paper**

| Name | Sequence |
| --- | --- |
| *BRI1-F* (BiFC) | CTGATCAAGAGACAGGATCCATGAAGACTTTTTCAAGCT |
| *BRI1-R* (BiFC) | CCACCTCCACTAGTGTCGACTAATTTTCCTTCAGGAACT |
| *AHA2 (aa65-948) -F* (BiFC) | TCTGATCAAGAGACAGGATCCATGTGGAATCCACTTTCA |
| *AHA2 (aa65-948) -R* (BiFC) | CATACCTCCACTAGTGTCGACCACAGTGTAGTGACTGGGAG |
| *AHA7-F* (BiFC) | CGCGTCGACATGACGGACATAGAAGCTC |
| *AHA7-R* (BiFC) | CCCTCGAGGATTGTGTAGTTGTTGCTG |
